# Supplementary material
Source: Elsevier journal article supplement (https://www.sciencedirect.com/science/article/pii/S0025775319305111)
Supplement: mmc1 [file S0025775319305111:mmc1.docx]

**Anexo 1. Grupo de Trabajo del Proyecto EPISER 2016.**

Lucía Silva-Fernández(Complexo Hospitalario Universitario de Ferrol); Francisca Sivera,Neus Quilis Martí (Hospital General Universitario de Elda); Francisco J. Blanco (Complejo Hospitalario Universitario de A Coruña); Fernando Pérez Ruiz, Joana Atxotegi Sáenz de Buruaga, Irati Urionagüena Onaindia, Boris Anthony Blanco Cáceres (Hospital Universitario Cruces); Antonio Juan-Mas (Hospital Son LLàtzer); José M. Pego-Reigosa(Complejo Hospitalario Universitario de Vigo); Javier Narváez(Hospital Universitario de Bellvitge); Raúl Cortés Verdú(Hospital General de Ontinyent); Fred Antón-Pagés(Complejo Asistencial Universitario de Palencia); Víctor Quevedo Vila(Hospital Comarcal de Monforte de Lemos); Laura Garrido Courel, Natividad del Val del Amo, Inmaculada Paniagua Zudaire (Complejo Hospitalario de Navarra); Gustavo Añez Sturchio, Fermín Medina Varo, Myriam Gandía Martínez (Hospital Universitario Puerta del Mar); Antonio Romero Pérez(Complejo Hospitalario de Jaén); Javier Ballina, Anahy Brandy García(Hospital Universitario Central de Asturias); Dolores Fábregas Canales(Hospital de Barbastro); Teresa Font Gayá, Carolina Bordoy Ferrer(Hospital Comarcal de Inca); Beatriz González Álvarez, Laura Casas Hernández, Fátima Álvarez Reyes, Mónica Delgado Sánchez(Hospital Universitario Nuestra Señora de la Candelaria); Cristina Martínez Dubois (Hospital Universitario Marqués de Valdecilla); Simón Ángel Sánchez-Fernández, Luisa Marena Rojas Vargas, Paula Virginia García Morales(Complejo Hospitalario Mancha Centro); Alejandro Olivé, Paula Rubio Muñoz(Hospital Universitari Germans Trias i Pujol); Marta Larrosa, Noemí Navarro Ricos, Eduard Graell Martín(Hospital Universitari Parc Taulí); Eugenio Chamizo, Lara Chaves Chaparro, Sara Rojas Herrera(Hospital de Mérida); Jordi Pons Dolset, Miguel Ángel Polo Ostariz, Susana Ruiz-Alejos Garrido(Fundación Hospital Calahorra); Cristina Macía Villa, Ana Cruz Valenciano (Hospital Universitario Severo Ochoa); María Luisa González Gómez, Mercedes Morcillo Valle (Hospital El Escorial); Deseada Palma Sánchez, María José Moreno Martínez, Marta Mayor González (Hospital General Universitario Rafael Méndez).
